# Supplementary material for: Brassica oleracea Var italica by-Products Prevent Lipid Accumulation and Cell Death in a Liver Cell Model of Lipid Toxicity
Source: MDPI journal article supplement (doi:10.3390/nu15040924), 2023-02-12
Supplement: s1 [file s1]

Article

# ***Brassica oleracea* var *italica* by-products prevent lipid accumulation and cell death in a liver cell model of lipid toxicity**

José P. Castelão-Baptista <sup>1</sup>, Sara Valente <sup>1</sup>, Sara Canário <sup>1</sup>, David Oppolzer <sup>2,3</sup>, Ana Barros <sup>2,3</sup>, Carlos Venâncio <sup>2,3</sup>, Tânia Martins <sup>2,3</sup>, Luís Antunes <sup>2,3</sup>, Vilma A. Sardão <sup>1</sup>, Eduardo Rosa <sup>2,3</sup>, Paulo J. Oliveira <sup>1,\*</sup>

<sup>1</sup> CNC – Center for Neuroscience and Cell Biology, UC-Biotech, University of Coimbra, Cantanhede, Portugal

<sup>2</sup> Centre for the Research and Technology of Agro-Environmental and Biological Sciences (CITAB), University of Trás-os-Montes and Alto Douro (UTAD), Vila Real, Portugal

<sup>3</sup> Inov4Agro - Institute for Innovation, Capacity building and Sustainability of Agri-Food production, UTAD, Vila Real, Portugal

\* Correspondence: Paulo J. Oliveira, CNC-Center for Neuroscience and Cell Biology, CIBB - Centre for Innovative Biomedicine and Biotechnology, University of Coimbra, 3004-504 Coimbra, Portugal 3060-197, Portugal. E-mail: pauloliv@cnc.uc.pt

## **Supplementary Tables**

**Supplementary Table 1.** Pre- and co-incubation treatment periods of broccoli extract for assessment of antioxidant and lipoprotective effects.

|             | Pre-incubation (hours) | Co-Incubation (hours) |
|-------------|------------------------|-----------------------|
| <b>tBHP</b> | 0                      | 3                     |
|             | 24                     | 3                     |
|             | 28                     | 3                     |
| <b>FFA</b>  | 0                      | 24                    |
|             | 24                     | 24                    |

## **Supplementary Figures**

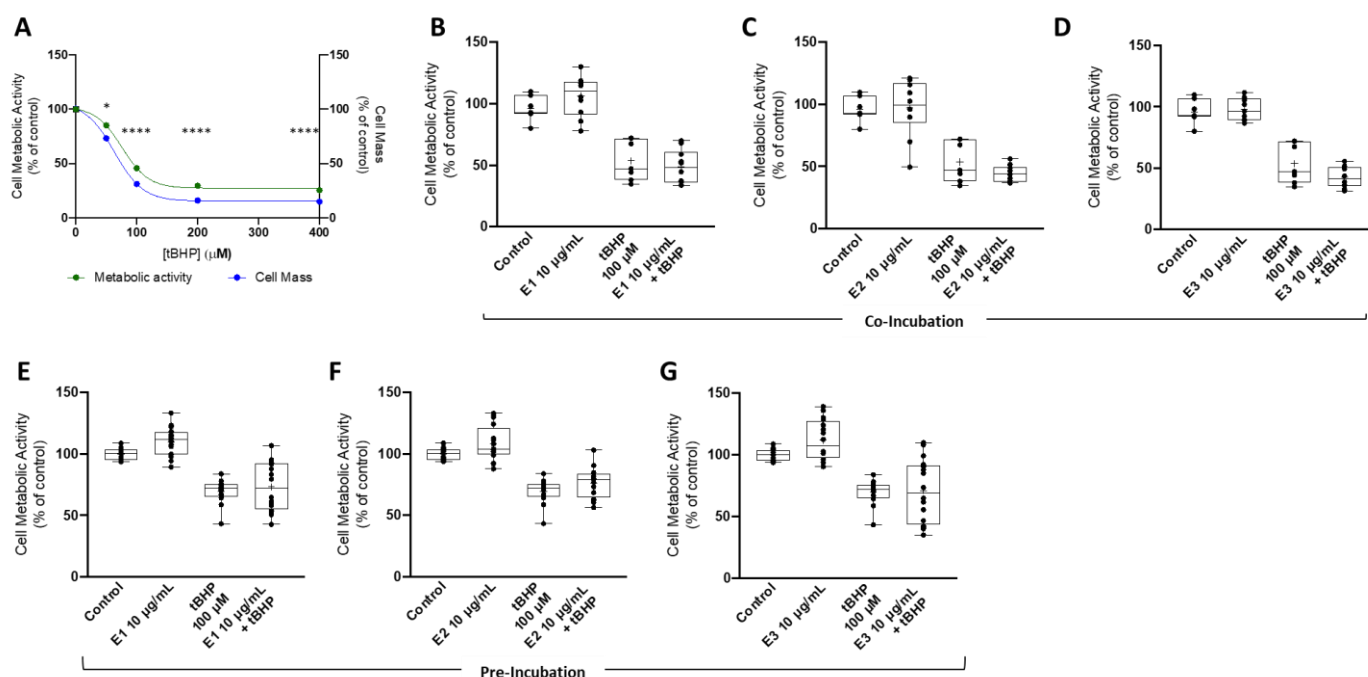

**Supplementary Figure 1. Antioxidant effect of *Brassica oleracea* extracts towards tert-butyl hydroperoxide (tBHP)-induced cell damage.** (A) HepG2 cells were seeded and then treated with increasing concentrations of t-BHP for 3 h and cytotoxic effects were evaluated through variations in cell metabolic activity and mass. HepG2 cells were also (B–D) co-incubated or (E–G) pre-incubated with BBP extracts ((B and E) E1, (C and F) E2 or (D and G) E3) and then subjected to t-BHP (100  $\mu\text{M}$ ; 3 h) treatment. The antioxidant effects of BBP extracts were evaluated through variations in cell metabolic activity using the resazurin reduction assay. Data are mean  $\pm$  SEM of four different assays performed, and the results normalized on the control condition (CTL = 100%). The data obtained with BBP extracts was compared to CTL using a one-way ANOVA with Dunnett multiple comparison post-test. Significant differences between the indicated conditions are marked by \* ( $p < 0.05$ ), \*\*\*\* ( $p < 0.0001$ ).
